# Supplementary material for: Vitamin D levels and clinical outcomes of SARS-CoV-2 Omicron subvariant BA.2 in children: A longitudinal cohort study
Source: PubMed Central journal article supplement (PMC9358048; doi:10.3389/fnut.2022.960859), 2022-07-25
Supplement: Table_1.pdf [file Table_1.pdf]

Table S1: Effects of vitamin D status on dynamic changes in laboratory parameters in children infected with SARS-CoV-2 subvariant BA.2

| Time period (days)                | Cycle threshold for N gene |                       | P value |
|-----------------------------------|----------------------------|-----------------------|---------|
|                                   | The iVD group              | The sVD group         |         |
| T <sub>1</sub> ≤ 1 [median (IQR)] | 18.5 (15.8-27.2) n=69      | 22.5 (15.2-28.9) n=30 | 0.75    |
| 1 < T <sub>2</sub> ≤ 3            | 19.8 (18.5-22.7) n=15      | 30.6 (20.2-32.7) n=15 | 0.03    |
| 3 < T <sub>3</sub> ≤ 5            | 24.5 (21.1-30.3) n=32      | 24.4 (20.5-32.6) n=13 | 0.69    |
| 5 < T <sub>4</sub> ≤ 7 [mean±SD]  | 28.3±4.6 n=40              | 26.4±5.1 n=14         | 0.19    |
| 7 < T <sub>5</sub> ≤ 14           | 33.1 (29.6-35.9) n=63      | 31.9 (27.8-34.2) n=30 | 0.15    |
| 14 < T <sub>6</sub> ≤ 21          | 36.1 (33.9-37.3) n=49      | 35.9 (33.7-37.7) n=19 | 0.76    |
| 21 < T <sub>7</sub> ≤ 28          | 36.5 (35.4-37.7) n=29      | 36.6 (34.3-37.8) n=12 | 0.79    |

  

| Time period (days)                | Cycle threshold for ORF1ab gene |                       | P value |
|-----------------------------------|---------------------------------|-----------------------|---------|
|                                   | The iVD group                   | The sVD group         |         |
| T <sub>1</sub> ≤ 1 [median (IQR)] | 20.1 (16.9-28.2) n=69           | 23.7 (16.8-28.7) n=31 | 0.56    |
| 1 < T <sub>2</sub> ≤ 3            | 20.1 (19.4-23.3) n=15           | 31.4 (20.6-33.3) n=15 | 0.03    |
| 3 < T <sub>3</sub> ≤ 5            | 24.2 (22.5-29.5) n=31           | 27 (20.1-33.4) n=13   | 0.61    |
| 5 < T <sub>4</sub> ≤ 7 [mean±SD]  | 28.9±4.9 n=39                   | 27.2±5.5 n=14         | 0.27    |
| 7 < T <sub>5</sub> ≤ 14           | 33.4 (29.7-36.9) n=47           | 32.6 (28.1-37.7) n=30 | 0.75    |
| 14 < T <sub>6</sub> ≤ 21          | 35.3 (33.8-37.9) n=23           | 37.9 (34.9-39.2) n=18 | 0.18    |
| 21 < T <sub>7</sub> ≤ 28          | 37.9 (36.9-38.8) n=10           | 38.2 (35.8-38.4) n=7  | 0.38    |

  

| Time period (days)       | WBC (×10 <sup>9</sup> ) |                       | P value |
|--------------------------|-------------------------|-----------------------|---------|
|                          | The iVD group           | The sVD group         |         |
| T <sub>1</sub> ≤ 1       | 5.52 (4.49-6.8) n=78    | 5.84 (4.63-7.14) n=35 | 0.34    |
| 1 < T <sub>2</sub> ≤ 3   | 4.73 ± 1.25 n=15        | 6.31 ± 2.08 n=13      | 0.02    |
| 3 < T <sub>3</sub> ≤ 5   | 5.39 (3.34-6.41) n=16   | 5.82 (4.86-7.12) n=5  | 0.45    |
| 5 < T <sub>4</sub> ≤ 7   | 5.41 ± 0.82 n=11        | 7.46 ± 2.12 n=4       | 0.02    |
| 7 < T <sub>5</sub> ≤ 14  | 6.84 ± 2.06 n=23        | 6.55 ± 1.33 n=4       | 0.79    |
| 14 < T <sub>6</sub> ≤ 21 | 5.05 (4.64-6.18) n=11   | 7.15 (6.11-7.43) n=5  | 0.15    |

  

| Time period (days)       | Hemoglobin (g/L)     |                        | P value |
|--------------------------|----------------------|------------------------|---------|
|                          | The iVD group        | The sVD group          |         |
| T <sub>1</sub> ≤ 1       | 133 (128-143.5) n=80 | 131 (123-138) n=36     | 0.03    |
| 1 < T <sub>2</sub> ≤ 3   | 133 (127-138) n=17   | 129 (122.5-134.5) n=15 | 0.18    |
| 3 < T <sub>3</sub> ≤ 5   | 134.9 ± 12.1 n=20    | 134.8 ± 14.4 n=6       | 0.99    |
| 5 < T <sub>4</sub> ≤ 7   | 137.3 ± 5.5 n=11     | 130.3 ± 6.1 n=4        | 0.053   |
| 7 < T <sub>5</sub> ≤ 14  | 135.8 ± 10.6 n=23    | 128 ± 11.6 n=4         | 0.19    |
| 14 < T <sub>6</sub> ≤ 21 | 133 ± 7.3 n=11       | 130 ± 10.2 n=5         | 0.51    |

  

| Time period (days) | Platelet (×10 <sup>9</sup> ) |               | P value |
|--------------------|------------------------------|---------------|---------|
|                    | The iVD group                | The sVD group |         |

|                    |                    |                    |       |
|--------------------|--------------------|--------------------|-------|
| $T_1 \leq 1$       | 217 (184-264) n=80 | 241 (195-300) n=36 | 0.16  |
| $1 < T_2 \leq 3$   | $211 \pm 58$ n=17  | $220 \pm 60$ n=15  | 0.67  |
| $3 < T_3 \leq 5$   | 201 (182-260) n=20 | 263 (252-271) n=6  | 0.11  |
| $5 < T_4 \leq 7$   | $271 \pm 61$ n=11  | $269 \pm 69$ n=4   | 0.97  |
| $7 < T_5 \leq 14$  | $301 \pm 66$ n=23  | $401 \pm 32$ n=4   | 0.007 |
| $14 < T_6 \leq 21$ | $299 \pm 56$ n=11  | $375 \pm 134$ n=5  | 0.28  |

| Time period (days) | Lymphocyte ( $\times 10^9$ ) |                       | P value |
|--------------------|------------------------------|-----------------------|---------|
|                    | The iVD group                | The sVD group         |         |
| $T_1 \leq 1$       | 1.15 (0.74-1.85) n=78        | 1.61 (1.03-3.33) n=35 | 0.02    |
| $1 < T_2 \leq 3$   | 1.95 (1.54-2.29) n=17        | 3.74 (2.34-5.04) n=15 | 0.001   |
| $3 < T_3 \leq 5$   | 2.06 (1.9-3.22) n=20         | 3.93 (3.21-5.8) n=6   | 0.01    |
| $5 < T_4 \leq 7$   | 2.73 (2.44-2.94) n=11        | 4.85 (4.02-6.93) n=4  | 0.02    |
| $7 < T_5 \leq 14$  | 2.83 (2.49-3.63) n=23        | 4.39 (3.62-5.02) n=4  | 0.08    |
| $14 < T_6 \leq 21$ | 2.5 (2.25-2.79) n=11         | 4.35 (3.76-4.73) n=5  | 0.07    |

| Time period (days) | IL-6 (pg/mL)         |                       | P value |
|--------------------|----------------------|-----------------------|---------|
|                    | The iVD group        | The sVD group         |         |
| $T_1 \leq 1$       | 12.9 (7.5-21.2) n=78 | 18.4 (13.6-24.6) n=35 | 0.003   |
| $1 < T_2 \leq 3$   | 9.6 (7.6-14.6) n=17  | 9.2 (8-17.7) n=12     | 0.81    |
| $3 < T_3 \leq 5$   | 9.5 (7.6-17.1) n=17  | 16.2 (8.8-21.1) n=6   | 0.35    |
| $5 < T_4 \leq 7$   | 10 (6.6-19) n=14     | 18.7 (11.3-22.4) n=4  | 0.33    |
| $7 < T_5 \leq 14$  | 11.3 (7-20.5) n=16   | 8.2 (6.5-13) n=5      | 0.35    |
| $14 < T_6 \leq 21$ | $8.8 \pm 5.5$ n=10   | $15.9 \pm 10.7$ n=4   | 0.12    |

| Time period (days) | Procalcitonin (ng/mL) |                       | P value |
|--------------------|-----------------------|-----------------------|---------|
|                    | The iVD group         | The sVD group         |         |
| $T_1 \leq 1$       | 0.1 (0.06-0.19) n=78  | 0.15 (0.08-0.28) n=35 | 0.03    |
| $1 < T_2 \leq 3$   | $0.07 \pm 0.03$ n=17  | $0.14 \pm 0.09$ n=12  | 0.03    |
| $3 < T_3 \leq 5$   | 0.07 (0.05-0.12) n=17 | 0.21 (0.13-0.33) n=6  | 0.02    |
| $5 < T_4 \leq 7$   | 0.06 (0.04-0.07) n=14 | 0.08 (0.05-0.08) n=4  | 0.38    |
| $7 < T_5 \leq 14$  | 0.05 (0.04-0.06) n=16 | 0.05 (0.04-0.07) n=5  | 0.72    |
| $14 < T_6 \leq 21$ | $0.04 \pm 0.01$ n=10  | $0.07 \pm 0.04$ n=4   | 0.18    |

| Time period (days) | C-reactive protein (mg/L) |                    | P value |
|--------------------|---------------------------|--------------------|---------|
|                    | The iVD group             | The sVD group      |         |
| $T_1 \leq 1$       | 3.7 (0.7-7.8) n=23        | 3.3 (1.1-5.1) n=6  | 0.48    |
| $1 < T_2 \leq 3$   | 1.2 (0.5-5.5) n=13        | 2.8 (1.6-4.3) n=4  | 0.47    |
| $3 < T_3 \leq 5$   | 3.1 (2.1-14.1) n=11       | 5.9 (2-14.8) n=5   | 0.91    |
| $5 < T_4 \leq 7$   | 2.2 (0.8-3.5) n=12        | 1.5 (0.5-5.9) n=4  | 0.77    |
| $7 < T_5 \leq 14$  | 3 (0.8-8.9) n=33          | 1.5 (0.6-3.1) n=13 | 0.17    |
| $14 < T_6 \leq 21$ | 1.8 (0.6-5.7) n=53        | 2.2 (1.8-9.2) n=23 | 0.24    |
| $21 < T_7 \leq 28$ | 3.8 (1.3-6.5) n=25        | 0.6 (0.5-6.8) n=3  | 0.73    |

| Time period (days)      | Activated partial thromboplastin time (S) |                 | P value |
|-------------------------|-------------------------------------------|-----------------|---------|
|                         | The iVD group                             | The sVD group   |         |
| T <sub>1</sub> ≤ 1      | 42.4 ± 5.1 n=79                           | 43.9 ± 5.4 n=35 | 0.16    |
| 1 < T <sub>2</sub> ≤ 3  | 40.5 ± 2.7 n=13                           | 42.2 ± 4.8 n=7  | 0.34    |
| 3 < T <sub>3</sub> ≤ 5  | 40 ± 2.5 n=12                             | 44.2 ± 2.5 n=4  | 0.01    |
| 5 < T <sub>4</sub> ≤ 7  | 40.7 ± 4.1 n=10                           | 41.5 ± 2 n=4    | 0.71    |
| 7 < T <sub>5</sub> ≤ 14 | 41.1 ± 3.4 n=14                           | 42.1 ± 6.4 n=4  | 0.68    |

| Time period (days)      | Prothrombin time (S)  |                    | P value |
|-------------------------|-----------------------|--------------------|---------|
|                         | The iVD group         | The sVD group      |         |
| T <sub>1</sub> ≤ 1      | 14 ± 0.8 n=79         | 13.8 ± 1.1 n=35    | 0.42    |
| 1 < T <sub>2</sub> ≤ 3  | 13.1 ± 0.6 n=13       | 13.2 ± 0.5 n=7     | 0.96    |
| 3 < T <sub>3</sub> ≤ 5  | 12.8 (12.6-13.3) n=12 | 13.7 (13.3-14) n=4 | 0.058   |
| 5 < T <sub>4</sub> ≤ 7  | 13.2 ± 0.6 n=10       | 13.2 ± 0.6 n=4     | 0.94    |
| 7 < T <sub>5</sub> ≤ 14 | 13.3 ± 0.7 n=14       | 13.6 ± 1.3 n=4     | 0.55    |

| Time period (days)      | Fibrinogen (g/L) |                | P value |
|-------------------------|------------------|----------------|---------|
|                         | The iVD group    | The sVD group  |         |
| T <sub>1</sub> ≤ 1      | 2.6 ± 0.5 n=79   | 2.5 ± 0.4 n=35 | 0.33    |
| 1 < T <sub>2</sub> ≤ 3  | 2.7 ± 0.3 n=13   | 2.1 ± 0.3 n=7  | <0.001  |
| 3 < T <sub>3</sub> ≤ 5  | 2.5 ± 0.4 n=12   | 2.3 ± 0.4 n=4  | 0.43    |
| 5 < T <sub>4</sub> ≤ 7  | 2.6 ± 0.4 n=10   | 2.6 ± 0.2 n=4  | 0.85    |
| 7 < T <sub>5</sub> ≤ 14 | 2.6 ± 0.5 n=14   | 2.7 ± 0.6 n=4  | 0.78    |

| Time period (days)      | D-dimer (µg/mL)       |                       | P value |
|-------------------------|-----------------------|-----------------------|---------|
|                         | The iVD group         | The sVD group         |         |
| T <sub>1</sub> ≤ 1      | 0.27 (0.22-0.42) n=77 | 0.34 (0.26-0.49) n=35 | 0.03    |
| 1 < T <sub>2</sub> ≤ 3  | 0.28 (0.22-0.43) n=13 | 0.5 (0.41-2.69) n=7   | 0.04    |
| 3 < T <sub>3</sub> ≤ 5  | 0.23 (0.22-0.34) n=12 | 0.52 (0.23-0.81) n=4  | 0.23    |
| 5 < T <sub>4</sub> ≤ 7  | 0.28 (0.22-0.33) n=10 | 0.55 (0.26-0.81) n=4  | 0.25    |
| 7 < T <sub>5</sub> ≤ 14 | 0.22 (0.22-0.24) n=14 | 0.22 (0.22-0.23) n=4  | 0.36    |

| Time period (days)       | Calcium (mmol/L)      |                       | P value |
|--------------------------|-----------------------|-----------------------|---------|
|                          | The iVD group         | The sVD group         |         |
| T <sub>1</sub> ≤ 1       | 2.41 (2.36-2.42) n=11 | 2.45 (2.41-2.52) n=6  | 0.15    |
| 1 < T <sub>2</sub> ≤ 3   | 2.41 (2.38-2.54) n=12 | 2.35 (2.29-2.41) n=6  | 0.19    |
| 3 < T <sub>3</sub> ≤ 5   | 2.4 (2.35-2.43) n=8   | 2.41 (2.41-2.43) n=5  | 0.29    |
| 5 < T <sub>4</sub> ≤ 7   | 2.41 (2.36-2.43) n=10 | 2.41 (2.41-2.44) n=5  | 0.71    |
| 7 < T <sub>5</sub> ≤ 14  | 2.38 (2.32-2.43) n=20 | 2.52 (2.41-2.54) n=5  | 0.03    |
| 14 < T <sub>6</sub> ≤ 21 | 2.41 (2.33-2.45) n=26 | 2.46 (2.42-2.49) n=11 | 0.03    |
| 21 < T <sub>7</sub> ≤ 28 | 2.5 (2.33-2.56) n=17  | 2.44 (2.35-2.54) n=5  | 0.58    |

| Time period (days) | Phosphorus (mmol/L)  |                     | <i>P</i> value |
|--------------------|----------------------|---------------------|----------------|
|                    | The iVD group        | The sVD group       |                |
| $T_1 \leq 1$       | 1.45 ± 0.27 n=11     | 1.42 ± 0.31 n=6     | 0.69           |
| $1 < T_2 \leq 3$   | 1.25 (1.15-1.4) n=12 | 1.3 (1.2-1.5) n=6   | 0.42           |
| $3 < T_3 \leq 5$   | 1.34 (1.3-1.45) n=8  | 1.4 (1.1-1.4) n=5   | 0.88           |
| $5 < T_4 \leq 7$   | 1.48 ± 0.24 n=10     | 1.62 ± 0.33 n=5     | 0.36           |
| $7 < T_5 \leq 14$  | 1.37 (1.25-1.4) n=20 | 1.45 (1.39-1.6) n=5 | 0.73           |
| $14 < T_6 \leq 21$ | 1.36 ± 0.24 n=26     | 1.39 ± 0.35 n=11    | 0.16           |
| $21 < T_7 \leq 28$ | 1.35 ± 0.26 n=17     | 1.58 ± 0.42 n=5     | 0.14           |

Note: IL-6, interleukin-6; IQR, interquartile range; SARS-CoV-2, severe acute respiratory syndrome coronavirus 2; SD, standard deviation; WBC, white blood cell.
